# Supplementary material for: Experimental evidence that hyperthermia limits offspring provisioning in a temperate-breeding bird
Source: PubMed Central journal article supplement (PMC7657879; doi:10.1098/rsos.201589), 2020-10-07
Supplement: rsos201589_review_history.pdf [file rsos201589_review_history.pdf]

## **Experimental evidence that hyperthermia limits offspring provisioning in a temperate-breeding bird**

Simon Tapper, Joseph J. Nocera and Gary Burness

### **Article citation details**

*R. Soc. open sci.* **7**: 201589.  
<http://dx.doi.org/10.1098/rsos.201589>

### **Review timeline**

Original submission: 7 September 2020  
Final acceptance: 16 September 2020

Note: Reports are unedited and appear as submitted by the referee. The review history appears in chronological order.

Note: This manuscript was transferred from another Royal Society journal with peer review.

## Review History

### Decision letter (RSOS-201589.R0)

We hope you are keeping well at this difficult and unusual time. We continue to value your support of the journal in these challenging circumstances. If Royal Society Open Science can assist you at all, please don't hesitate to let us know at the email address below.

Dear Mr Tapper:

It is a pleasure to accept your manuscript entitled "**Experimental evidence that hyperthermia limits offspring provisioning in a temperate-breeding bird**" in its current form for publication in Royal Society Open Science. The comments of the reviewer(s) who reviewed your manuscript are included at the foot of this letter.

You can expect to receive a proof of your article in the near future. Please contact the editorial office ([openscience\\_proofs@royalsociety.org](mailto:openscience_proofs@royalsociety.org)) and the production office ([openscience@royalsociety.org](mailto:openscience@royalsociety.org)) to let us know if you are likely to be away from e-mail contact -- if you are going to be away, please nominate a co-author (if available) to manage the proofing process, and ensure they are copied into your email to the journal.

Please ensure you make the minor typographical adjustments during the proofing process.

Due to rapid publication and an extremely tight schedule, if comments are not received, your paper may experience a delay in publication.

Reports © 2020 The Reviewers; Decision Letters © 2020 The Reviewers and Editors;  
Responses © 2020 The Reviewers, Editors and Authors. Published by the Royal Society under the terms of the Creative Commons Attribution License <http://creativecommons.org/licenses/by/4.0/>, which permits unrestricted use, provided the original author and source are credited

Please see the Royal Society Publishing guidance on how you may share your accepted author manuscript at <https://royalsociety.org/journals/ethics-policies/media-embargo/>.

Thank you for your fine contribution. On behalf of the Editors of Royal Society Open Science, we look forward to your continued contributions to the Journal.

Kind regards,  
Andrew Dunn  
Royal Society Open Science Editorial Office  
Royal Society Open Science  
[openscience@royalsociety.org](mailto:openscience@royalsociety.org)

on behalf of Dr Cynthia Downs (Associate Editor) and Professor Kevin Padian (Subject Editor).

Associate Editor Dr Cynthia Downs Comments to Author:

Associate Editor

Comments to the Author:

This manuscript was previously reviewed by three reviewers and an editor at Proc B and was transferred to Open Science. The version transferred to Open Science included revisions to address the previous reviews. The study presented demonstrated that environmental temperatures mediate behavior and that hyperthermia can limit offspring provisioning. This straightforward, experimental test of this concept is essential to document in the literature, although it is not the first test of this concept. The authors' revisions to the manuscript sufficiently address the reviewers' comments, the experiment is scientifically sound, and the manuscript is clearly written.

Line edits:

Line 32: Add "treatment" before individuals to clarify that treatment individuals are still being discussed.

Line 135: Change "between" to "among"

Follow Royal Society Publishing on Twitter: @RSocPublishing

Follow Royal Society Publishing on Facebook:

<https://www.facebook.com/RoyalSocietyPublishing.FanPage/>

Read Royal Society Publishing's blog: <https://blogs.royalsociety.org/publishing/>
